# 1 Rapid *in vitro* prototyping of O-methyltransferases for pathway 2 applications in *Escherichia coli*

3 Kristina Haslinger\*<sup>1,2</sup>, Thomas Hackl<sup>3</sup> and Kristala L.J. Prather\*<sup>1</sup>

4 <sup>1</sup> Dept. of Chemical Engineering, Massachusetts Institute of Technology, Cambridge, USA

5 <sup>2</sup> Dept. of Chemical and Pharmaceutical Biology, University of Groningen, Groningen, The Netherlands

6 <sup>3</sup> Biomolecular Mechanisms, Max Planck Institute for Medical Research, Heidelberg, Germany

7 \*corresponding authors, e-mail: k.haslinger@rug.nl and kljp@mit.edu

## 8 Abstract

9 O-methyltransferases are ubiquitous enzymes involved in biosynthetic pathways for secondary  
10 metabolites such as bacterial antibiotics, human catecholamine neurotransmitters, and plant  
11 phenylpropanoids. While thousands of putative O-methyltransferases are found in sequence databases,  
12 few examples are functionally characterized. From a pathway engineering perspective, however, it is  
13 crucial to know the substrate and product ranges of the respective enzymes to fully exploit their  
14 catalytic power.

15 In this study, we developed an *in vitro* prototyping workflow that allowed us to screen ~30 enzymes  
16 against five substrates in three days with high reproducibility. We combined *in vitro*  
17 transcription/translation of the genes of interest with a microliter-scale enzymatic assay in 96-well  
18 plates. The substrate conversion was indirectly measured by quantifying the consumption of the S-  
19 adenosyl-L-methionine co-factor by time-resolved fluorescence resonance energy transfer rather than  
20 time-consuming product analysis by chromatography. This workflow allowed us to rapidly prototype  
21 thus-far uncharacterized O-methyltransferases for future use as biocatalysts.

## 22 Introduction

23 Methylation of secondary metabolites is a prevalent reaction that alters the bioavailability and reactivity  
24 of molecules<sup>1</sup>. This effect is important for the native function of secondary metabolites for the producer  
25 organism but also for pharmaceutical and nutraceutical applications of natural products. One example is  
26 the oxygen-directed methylation (O-methylation) of the lignin precursor caffeic acid towards ferulic  
27 acid. This reaction is crucial for regulating the rigidity of lignified cell walls in vascular plants<sup>2</sup> and has  
28 been described to modulate the cytotoxicity and radical scavenging properties of isolated phenolic acids  
29 when tested for pharmaceutical applications such as neuroprotection<sup>3,4</sup>. Similar observations were

30 made for methylated flavonoids (plants)<sup>5,6</sup>, antimicrobial peptides (bacteria)<sup>7,8</sup> and dopamine (humans)<sup>9</sup>.  
31 O-methylation in nature is carried out by methyltransferases under the utilization of S-adenosyl-L-  
32 methionine (SAM) as an electron-deficient methyl donor thereby forming S-adenosyl-L-homocysteine.  
33 Some O-methyltransferase (OMT) families additionally require the presence of metal ions such as Mg<sup>2+</sup>.  
34 For OMTs acting on small molecules (excluding nucleic acids and proteins), there are several protein  
35 families with distinct sequence motifs and with a remarkable breadth in functionality. The functional  
36 exploration of these families has been somewhat anecdotal to date and has been very much focused on  
37 plant enzymes of the methyltransferase families 2 (PF00891) and 3 (PF01596)<sup>1</sup>. This can most likely be  
38 attributed to the fact that already in the pre-genomic era, these plant enzymes had been studied with  
39 biochemical methods<sup>10,11</sup>. However, with the rapid expansion of genomes sequenced to date, the  
40 methyltransferase protein families are growing by the minute and functional studies are lagging  
41 behind<sup>12</sup>.

42 In the last decade rapid advances in parallelization of molecular cloning, enzymatic assays, and even  
43 fermentation through liquid handling technologies and automation have greatly increased the  
44 throughput of functional studies of enzyme libraries<sup>13,14</sup>. However, the bottlenecks in these screening  
45 pipelines remain the failing of molecular cloning steps and the throughput of the reaction readout in the  
46 absence of colorimetric or fluorometric assays, which requires time-consuming chromatography  
47 methods to analyze the products<sup>15,16</sup>. To overcome these hurdles in the functional screening of SAM-  
48 dependent methyltransferases, we developed a rapid *in vitro* prototyping workflow to express and  
49 functionally screen a range of O-methyltransferases against several substrates. To minimize time and  
50 effort spent on molecular cloning, we employed a recently developed *in vitro* transcription/translation  
51 platform for linear DNA templates with high enzyme yields (myTXTL®)<sup>17,18</sup>, and combined it with a  
52 fluorescence-based read-out<sup>19,20</sup> to monitor the consumption of the SAM co-factor. For one substrate  
53 we translated the newly gained knowledge into the development of a microbial cell factory to produce  
54 ferulic acid from simple building blocks.

## 55 Results

### 56 Design and benchmarking of the prototyping workflow

57 In order to facilitate the fast screening of a library of putative O-methyltransferases against several  
58 substrates, we set out to develop a prototyping method that is rapid and parallelizable. Herein, we  
59 identified the detection of enzymatic activity and the cloning and expression of the genes of interest as  
60 the two major bottlenecks. For the detection of enzymatic activity, we deemed a desirable approach to  
61 be independent of the substrates and products and to not require time-consuming chromatography. We

62 turned towards commercially available assays to detect the consumption of the SAM cofactor and  
63 decided to use the TR-FRET Bridge-It<sup>®</sup> S-Adenosyl Methionine (SAM) Fluorescence Assay Kit from  
64 Mediomics LLC (St. Louis, Missouri). In this endpoint assay, SAM binds to a DNA-binding protein and  
65 induces the association of two fluorescently labeled DNA fragments (donor and acceptor) for Time-  
66 Resolved Foerster Resonance Energy Transfer (TR-FRET) to occur. We hypothesized that in this way,  
67 several enzymes could be screened against multiple substrates in parallel in the plate reader, with lower  
68 TR-FRET readings observed for active enzyme-substrate combinations. We set out to test this detection  
69 method with recombinantly expressed and purified MxSafC, an enzyme known to catalyze the  
70 methylation of caffeic acid<sup>25,32</sup>, and compare the TR-FRET read-out with product analysis by HPLC.  
71 Compared to the control reaction without enzyme, we saw consumption of caffeic acid and SAM, as  
72 measured by HPLC and TR-FRET, respectively, after 3h of incubation (Figure 1a). We observed a good  
73 correlation of the biological replicates within and across both detection methods with a slight over-  
74 estimation of substrate-consumption with the TR-FRET assay compared to HPLC detection.

75 In order to address the cloning and expression bottleneck, we decided to use an *in vitro*  
76 transcription/translation expression platform, myTXTL<sup>®</sup> from Arbor Bioscience (Ann Arbor, Michigan).  
77 This allowed us to express the genes of interest from synthetic, linear DNA fragments and saved us  
78 additional time for cloning, sequence verification, transformation, protein expression and cell lysis (~up  
79 to 3 weeks of work). The linear DNA fragments were designed to contain a  $\sigma 70$  promoter, a T500  
80 terminator and flanking overhangs of about 500bp to protect from degradation in the myTXTL<sup>®</sup> mix.  
81 Additionally, GamS protein was added to the reactions to protect the DNA fragments. We first tested  
82 the compatibility of the myTXTL<sup>®</sup> reaction mix with the OMT assay and the TR-FRET detection method  
83 with MxSafC expressed from a linear template (Figure 1b). We performed two TXTL reactions at 29°C  
84 over night and split them into three OMT reactions each. After stopping the OMT reactions, we analyzed  
85 them with the TR-FRET assay (two technical replicates) and HPLC. As negative controls we included two  
86 TXTL reactions that did not contain OMT-encoding DNA template (no technical replicates). Looking at  
87 the median of the data points, we again observe good correlation of the replicates within and cross the  
88 detection methods however, the TR-FRET assay appears to be more sensitive to experimental error than  
89 the HPLC detection. The biological replicates of the enzyme expression (TXTL reactions 1 and 2) show  
90 only minor deviation, indicating that the experimental error in the expression step of the workflow is  
91 minimal.

92 Since we observed good correlation between the two detection methods, yet low overall turnover  
93 yields, we proceeded with the established workflow with an extended incubation time for the OMT  
94 reaction (24h) in later experiments.

### 95 **Screening of putative OMTs for methylation of caffeic acid**

96 In order to diversify our knowledge of OMTs in organisms other than plants, the premise of this study  
97 was to characterize a range of putative OMTs from various non-plant donor organisms across a relatively  
98 wide sequence landscape. Therefore, we first identified distantly related OMTs in the NCBI reference  
99 proteome database based on Hidden Markov Models (HMM) constructed from known plant caffeic acid  
100 OMTs<sup>23,24</sup> (search input 1, Extended Data Table 1), and bacterial OMTs previously found to have a broad  
101 substrate tolerance towards catechols<sup>25-28</sup> (search input 2). We found 15,994 unique sequences from all  
102 kingdoms of life, from ~190 PFAM families (Supplementary File 1). About 85% of the sequences were  
103 annotated as methyltransferases, more specifically 82% as OMTs, and about 10% contained  
104 dimerization domains. We filtered the sequences by length and alignment score and constructed a  
105 sequence similarity network to group them into clusters by pairwise amino acid sequence similarity.  
106 From the thus generated clusters, putative OMTs were chosen for experimental characterization (Table  
107 1, Extended Data Figure 1) by taking the following criteria into consideration: the ranking of HMM scores  
108 within the clusters, a wide taxonomic spread over the selected enzymes and a balanced selection of  
109 enzymes found with the two HMMsearch runs. Multiple enzymes were chosen from the major clusters  
110 but also some high scoring putative OMTs were picked from the smallest clusters.

111 The first large-scale screen of the selected putative OMTs was performed with caffeic acid as the  
112 substrate. We analyzed the enzymatic reactions by HPLC and TR-FRET (Figure 2a,b) and repeated the  
113 experiment on a different day with a slightly different sample-handling workflow that allowed the  
114 consistent use of multichannel pipettes throughout the experiment (Figure 2c,d). The data points in the  
115 plots are ordered by increasing substrate turnover based on panel C. The HPLC analysis shows a good  
116 correlation of the independent experiments with each other, both in relative terms (ranking of the  
117 tested enzyme by performance) and in absolute terms. This again indicates that the expression levels in  
118 the TXTL reactions is highly reproducible and that the technical error in the OMT reaction is low.  
119 However, for the TR-FRET analysis of the first experiment (Figure 2b), it is evident that the technical  
120 error by manual sample dilution and setup of the TR-FRET detection assay is very high and therefore, the  
121 technical replicates deviate strongly. The overall noise of the experiment is very high, which becomes  
122 most apparent in the wells that appear to have higher SAM concentrations than the negative controls

123 (here shown at the bottom of the plot). These experimental errors were overcome with a slightly  
124 different sample handling procedure in the second experiment (Figure 2d), which shows dramatically  
125 decreased noise in the data and a clear distinction between true- and false-positives. However, even in  
126 the first experiment with high background noise the best-performing enzymes can be clearly  
127 distinguished from the other ones. In the intermediate range, it is difficult to make a distinct cut-off.  
128 However, depending on the goal of this screening step, the cut-off can be set at a lower or higher level  
129 of SAM consumption at the risk of including false-positives or excluding false-negatives, respectively. In  
130 this case, we decided to make a very conservative cut-off and to even carry some true-negatives  
131 forward to the characterization in *E. coli* (*vide infra*). Overall, we observe a clear correlation between the  
132 HPLC and TR-FRET read-out and were therefore encouraged to screen the enzymes against four other  
133 potential substrates: 1,2-dihydroxybenzene (catechol), ferulic acid, quercetin and dopamine.

### 134 Screening of putative OMTs against other substrates

135 Next, we sought to use our *in vitro* expression and testing workflow to screen our panel of putative  
136 OMTs against other substrates. We selected catechol and dopamine - two known substrates for MxSafC  
137 and plant caffeic acid OMTs-, quercetin - a flavonoid also often converted by plant caffeic acid OMTs -,  
138 and ferulic acid - the precursor for a non-natural double-methylated product. We ran all reactions in  
139 parallel by diluting the TXTL reactions after overnight expression and aliquoting them into microtiter  
140 plates with the OMT reaction mixes. After 24h we stopped the OMT reactions and assessed the SAM  
141 levels with the TR-FRET assay. We observed increased SAM consumption by 11 OMTs in the presence of  
142 catechol (Figure 3a) and by 15 OMTs in the presence of dopamine (Figure 3b), whereas in the presence  
143 of ferulic acid and quercetin, only low levels of SAM conversion were observed that are difficult to  
144 separate from the background noise of the assay (Figure 3c and d). Furthermore, we did not have any  
145 true positive controls for these substrates in the panel of enzymes. Therefore, we are inclined to  
146 interpret the results as negative for these substrates. Also, in the presence of dopamine, the separation  
147 of positives and negatives is less clear-cut than with catechol. However, since the background noise  
148 appears to be rather small, we'd suggest a more inclusive cut-off for further analysis.

149 Only considering the enzymes with highest SAM conversion, we see overlap in substrate acceptance for  
150 StyLOMT, RetFOMT, StrAOMT, OmnOMT and MesMOMT. While the former enzymes show increased  
151 SAM conversion in the presence of all three substrates, MesMOMT is not stimulated by dopamine.  
152 Several enzymes appear to display stronger substrate selectivity: KibPOMT and StiAOMT are selective  
153 for caffeic acid, HymGOMT, LegHOMT, MedSOMT, SapPOMT, SarHOMT and SeISOMT are selective for

154 catechol, and SalOMT is selective for dopamine. A sequence comparison of the tested OMTs shows that  
155 enzymes with similar activities also share higher sequence similarity with each other (Figure 4). Looking  
156 at the active site residues predicted based on multiple sequence alignments, we see that some of the  
157 tested OMTs display activity although they carry changes in the putative catalytic triad (Table 1). In the  
158 group of enzymes from HMMsearch 1 (plant input sequences) the catalytic triad should be H-E-E (in  
159 *Medicago sativa* COMT1\_MEDSA residues H269, E297 and E329<sup>39</sup>) and is highly conserved with a few  
160 exceptions: CreAOMT, GloKOMT, GloOMT, LegHOMT, with all enzymes being active. In the group of  
161 enzymes from HMMsearch 2 (bacterial input sequences) the catalytic triad should be K-N-D (in MxSafC  
162 residues K145, N69, D212<sup>40</sup>) and is even more conserved. Only three sequences AciOMT, DesAOMT and  
163 StiAOMT show significant changes in these amino acids, with only AciOMT being inactive. This suggests  
164 that there must be other changes in the active site architecture of these OMTs that compensate for  
165 these amino acid substitutions. With a stricter pre-selection based on sequence similarity and active site  
166 conservation, we might have missed these interesting OMTs, whereas our pre-screening approach  
167 enabled us to explore a wider sequence space.

### 168 Application of pre-screened OMTs in a pathway towards (iso-)ferulic acid

169 Lastly, we sought to use the pre-screened OMTs in an *E. coli* microbial cell factory. We chose to expand  
170 our previously constructed and optimized<sup>31,41</sup> pathway from tyrosine to caffeic acid<sup>31,41</sup> by one enzymatic  
171 step in order to generate the pharmaceutically relevant phenolic acid, ferulic acid and its regio-isomer  
172 4-methoxy-3-hydroxy-cinnamic acid (iso-ferulic acid). In order to select enzymes for testing in the  
173 recombinant pathway, we first explored the data from the pre-screening assay in the context of enzyme  
174 expression, protein sequence and the donor organism. We found that the presence or absence of a  
175 band of the appropriate size in the SDS PAGE did not correlate with observed enzymatic activity  
176 (Extended Data Figure 2). For instance, in the lane of one of the best performing enzyme, StyLOMT, we  
177 did not see a distinct band on SDS PAGE. Whereas for some inactive enzymes such as, HalOMT, we saw a  
178 distinct band on SDS PAGE. This indicates that some enzymes are expressed at a low level yet active,  
179 whereas others are either not correctly expressed and folded, or were simply not challenged with the  
180 right substrate in this study. When mapping the pre-screening results onto the sequence similarity  
181 network we notice that the enzymes active on caffeic acid (Extended Data Figure 1, filled symbol) are  
182 distributed across the network with most of them being part of the main cluster. All active OMTs except  
183 MesMOMT show highest sequence similarity with the bacterial seed sequences (yellow box). This  
184 indicates that the bacterial input sequences provided a better search template for identifying new  
185 caffeic acid OMTs than the plant input sequences. Since some of the putative OMTs found with the plant

186 input sequences display activity against catechol and dopamine, we can exclude that the lack of activity  
187 on caffeic acid is caused by a general problem with our *in silico* selection, *in vitro* expression and pre-  
188 screening approach. However, for the putative OMTs that did not display activity on any of the tested  
189 substrates, we cannot rule out protein expression and folding problems. Two of the active enzymes,  
190 RetFOMT and StyLOMT, are from eukaryotic donors and the rest from bacterial donors. This indicates  
191 that the pre-screening method is also applicable to eukaryotic enzymes.

192 Based on the prescreening results, we chose the ten top-performing enzymes including the previously  
193 characterized StrAOMT<sup>28</sup> and MxSafC<sup>25,32</sup> and two enzymes that were inactive in the pre-screen: HalOMT  
194 (archaeal donor, visibly expressed) and SalOMT (archaeal donor, not visibly expressed). We cloned the  
195 respective genes into the vector pRSFduet::FjTAL, which already contained the tyrosine ammonia lyase  
196 gene from *Flavobacterium johnsoniae* (FjTAL, first pathway step) in a separate expression cassette, for  
197 expression under the T7 promoter (Extended Data Table 2). We co-transformed each new plasmid with  
198 two other plasmids encoding for the Cytochrome P450 monooxygenase CYP199A2 F185L  $\Delta$ 7 and its  
199 redox partners (second pathway step) from our previous study<sup>31</sup> into *E. coli* K12 MG1655DE3. In the  
200 resulting strains (s01-s12, Extended Data Table 3) L-tyrosine will be converted to *p*-coumaric acid by  
201 FjTAL, to caffeic acid by CYP199A2 F185L  $\Delta$ 7 and to (iso-)ferulic acid by the OMTs. As a negative  
202 control, we used a strain with the pRSF::FjTAL plasmid lacking an OMT gene (s00). In initial fermentation  
203 experiments with the modified M9 minimal media composition that we had previously used<sup>31</sup>, we did  
204 not observe significant product formation from glucose or fed L-tyrosine (data not shown) and therefore  
205 decided to first optimize the conditions for the OMT catalyzed step with a subset of the strains and in  
206 smaller scale reactions with fed caffeic acid. We observed that the addition of Mg<sup>2+</sup> (obligate co-factor  
207 for OMTs) by itself only led to slightly higher caffeic acid conversion, whereas feeding of L-methionine as  
208 a precursor for SAM improved the turnover by 2.2- to 3.6-fold (Figure 5a). This finding is consistent with  
209 previous observations for vanillin biosynthesis in *E. coli*<sup>42</sup> and indicates that SAM supply is limited and  
210 needs to be increased for OMT containing pathways to be efficient. With this knowledge, we tested all  
211 strains in 15 mL fermentations with glucose as a carbon source, L-tyrosine as a pathway precursor and  
212 Mg<sup>2+</sup> and L-methionine as additives for the OMT reaction. We observed product formation for all strains  
213 expressing OMTs that had tested active in the pre-screening step (Figure 5b). In most strains more than  
214 half of the caffeic acid formed was converted to the methylated products and four strains even achieved  
215 full conversion: s06 expressing PhoAOMT, s08 expressing StyLOMT, s09 expressing RetFOMT and s11  
216 expressing StrAOMT. In terms of titers, s11 displays the most desirable outcome with low titers for  
217 pathway intermediates and side products, and a high product titer of 0.49 mM +/- 0.06 mM (Figure 5c).

218 Interestingly, all OMTs displayed a strong regioselectivity for the meta-position over the para-position *in*  
219 *vivo*, although some showed a preference for the para-position in the *in vitro* screening step (Extended  
220 Data Table 4). This indicates that *in vitro* data cannot necessarily be directly translated into whole-cell  
221 applications. Nevertheless, our pre-screening step decreased the experimental load for cloning,  
222 fermentation and product analysis by HPLC by at least two-thirds. The best performing OMT, StrAOMT,  
223 had previously been observed to act on caffeic acid, however with low catalytic efficiency<sup>28</sup>. To our  
224 surprise it was one of the top-performers in the pre-screening and the pathway application in this study.  
225 To the best of our knowledge, StrAOMT has not been used in the context of a pathway before.

## 226 Discussion

227 Closing the gap between computational annotations and the biotechnological exploitation of natural  
228 enzymes as industrial biocatalysts requires extensive functional screening of enzyme libraries.  
229 Alternatively, scarce sampling of enzyme families and deep functional analysis (“thick data”) can be  
230 utilized to improve annotation pipelines and thus the interpretation of big data. In this study, we  
231 developed a rapid prototyping platform for SAM-dependent methyltransferases, an enzyme superfamily  
232 that has great potential for functionalization of natural product-inspired pharmaceuticals. The chosen  
233 approach follows in the footsteps of a range of studies utilizing *in vitro* transcription/translation systems  
234 for prototyping of antibodies<sup>43</sup>, protein expression enhancing factors<sup>44</sup>, transcription regulatory  
235 elements<sup>45</sup>, GPCRs<sup>46</sup>, quorum-sensing systems<sup>47</sup> and entire biosynthetic pathways<sup>48</sup>, which highlights the  
236 generalizability of this expression system<sup>49</sup>. In our study we observed that the enzymatic activity is highly  
237 reproducible across biological replicates of the *in vitro* transcription/translation system, which is in good  
238 agreement with the previous studies. In addition to the time and effort saved on molecular cloning,  
239 transformation and protein expression in *E. coli* (1-3 weeks), another advantage is that no additional  
240 lysis and clearing steps are required before the enzymatic reaction is performed. This is particularly  
241 advantageous for enzymes requiring cofactors that cannot cross the cell membrane, such as SAM. In our  
242 workflow, we combined the *in vitro* expression system with a microliter-scale enzymatic assay coupled  
243 to a TR-FRET read-out. While this read-out is sensitive to experimental error due to the small volumes  
244 and the required dilution steps, we were able to generate robust results by using master mixes and  
245 multichannel pipettes for all steps. The TR-FRET-based detection of the SAM cofactor - rather than a  
246 specific substrate or product - allows for the screening of a library of substrates. The format can  
247 furthermore be used to swiftly optimize reaction conditions, such as buffers, salts and substrate  
248 concentrations and thus generate “thick data”. The entire workflow should be amenable to automation  
249 by using liquid handling robots and is therefore scalable to also screen large enzyme libraries.



250 The workflow allowed us to rapidly screen ~30 enzymes against 5 substrates. In particular for caffeic  
251 acid as a substrate, we identified several distant homologues with remarkable activity, two of which  
252 don't even carry the conserved active site residues. With a more conservative *in silico* approach of  
253 selecting enzymes of interest, we might not even have considered these as suitable enzymes. However,  
254 our approach allowed us to cast a wide net, explore the activity of these distantly related enzymes and  
255 use them in an *E. coli* cell factory for ferulic acid, a methylated phenolic acid of pharmaceutical interest.  
256 Zooming in on these unexpected hits and their close relatives with structural and functional studies will  
257 allow us to better understand the underlying mechanisms of substrate selectivity and regioselectivity in  
258 OMTs.

259 Lastly, we tested a subset of the pre-screened OMTs in the context of a recombinant biosynthetic  
260 pathway in *E. coli*. We observed that all enzymes seen to be active in the pre-screening step were also  
261 catalytically active in the pathway, whereas enzymes found to be inactive in the screen, remained  
262 inactive in the pathway. The trends in substrate conversion levels and regio-selectivity, however, were  
263 not necessarily correlated between the *in vitro* and *in vivo* experiments. This is a hurdle well known to  
264 metabolic engineers and is inherent to *in vitro* characterization of enzymes. However, the high cost of *in*  
265 *vivo* screening in terms of time and consumables justifies the need for *in vitro* prototyping.

## 266 **Methods**

### 267 **Selection of enzymes of interest**

268 Two different multiple sequence alignments of known OMTs were generated with the Clustal Omega EBI  
269 webtool<sup>22</sup> (Extended Data Table 1) and used as input for HMMsearch (EBI webtool version 2.23.0<sup>21</sup>; data  
270 base of reference proteomes of all taxa excluding green plants (taxid: 33090), significance E-value cut-  
271 off 0.01 for the entire sequence and 0.03 for hits). The significant results were combined into one data  
272 set (Supplementary File 1) and used as an input for calculating a sequence similarity network with a  
273 webtool of the Enzyme Function Initiative (EFI-EST<sup>29</sup>; node selection cut-off: protein length between 180  
274 and 400 amino acids, edge selection cut-off: alignment score >30). The finalized network was visualized  
275 in Cytoscape 3.8.0<sup>30</sup> with the yFiles organic layout. For the representation in Extended Data Figure 1, the  
276 nodes were further filtered to exclude all nodes with an HMM score below 70 and all edges with  
277 sequence identity below 50%. From the thus generated clusters enzymes were chosen for experimental  
278 characterization (Table 1).

## 279 Design and synthesis of DNA templates for TXTL reactions

280 The selected genes were codon-optimized for expression in *E. coli* with the Integrated DNA Technologies  
281 (IDT) optimization algorithm and manually modified to exclude recognition sites for BsaI, NcoI, XhoI and  
282 where possible NdeI restriction enzymes. The 5' end of all DNA fragments was designed with an  
283 overhang of 500bp, the p70a promoter sequence and an NcoI recognition site to facilitate cloning into  
284 the pET21b(+) (Novagen) and pBEST (Arbor Bioscience) expression vectors. The 3' end was designed to  
285 include an XhoI recognition site, the T500 terminator and a 500bp overhang. The synthetic DNA was  
286 obtained from Arbor Bioscience (Ann Arbor, MI, USA) with an additional purification step to allow for  
287 direct use in the myTXTL<sup>®</sup> reaction for linear templates.

## 288 Construction of plasmids

289 All molecular cloning and plasmid propagation steps were performed in chemically competent  
290 *Escherichia coli* *E. cloni*<sup>®</sup> 10G (F- *mcrA*  $\Delta$ (*mrr-hsdRMS-mcrBC*) *endA1 recA1*  $\Phi$ 80*dlacZ* $\Delta$ M15  
291  $\Delta$ *lacX74 araD139  $\Delta$ (*ara, leu*)7697*galU galK rpsL nupG*  $\lambda$ -*tonA*) produced by Lucigen (Middleton, WI,  
292 USA). Genes encoding for OMTs selected for *in vivo* testing were cloned directly from the synthetic DNA  
293 fragments by restriction and ligation (NcoI/XhoI) into pET21b(+) for expression under the T7 promoter  
294 (Extended Data Table 2). From there the genes were amplified by polymerase chain reaction (PCR) with  
295 gene specific 5'primers and the T7 terminator primer to generate an NdeI recognition site at the 5'  
296 prime end. The PCR products were inserted by restriction and ligation (NdeI/XhoI) into the second  
297 multiple cloning site of the plasmid c71 (pRSF::FJTAL) for expression under the T7 promoter (Extended  
298 Data Table 2). All constructs were verified by sequencing by ETON Bioscience (Charlestown, MA, USA).  
299 Plasmids c71, c84 and c86 were constructed in a previous study<sup>31</sup>.*

## 300 *In vitro* transcription/translation

301 *In vitro* transcription/translation was performed with the myTXTL<sup>®</sup> kit from Arbor Bioscience according  
302 to the manufacturer's instructions. In brief, the synthesized DNA fragments were dissolved in nuclease-  
303 free water to a final concentration of 109.1 nM and stored at -70°C between experiments. All assay  
304 components were thawed on ice (myTXTL<sup>®</sup> lysate, GamS protein and DNA templates) and mixed by  
305 carefully pipetting up and down. To minimize pipetting errors, a master mix of myTXTL<sup>®</sup> lysate (9 $\mu$ L per  
306 reaction) and GamS protein (0.8  $\mu$ L per reaction) was prepared on ice and aliquoted into 1.5 mL  
307 microcentrifuge tubes. 2.2  $\mu$ L of DNA template were added to each tube and mixed by carefully  
308 pipetting up and down (final concentration 20 nM). The reactions were incubated on ice for 5 min and  
309 then transferred to a water bath at 29°C for 16 h. As negative controls ("no OMT"), one reaction was

310 performed with a DNA template not encoding for an OMT enzyme and one reaction with nuclease-free  
311 water without DNA.

## 312 SDS PAGE

313 To visualize protein expression 1  $\mu$ L of the TXTL reactions was mixed with 2  $\mu$ L of water and 3  $\mu$ L of 2x  
314 Laemmli loading dye (Bio-Rad, Hercules, CA, USA) and incubated at 90°C for 3 min. The denatured  
315 samples were loaded onto AnyKD™ Mini-PROTEAN® TGX™ precast protein gels (Bio-Rad, Hercules, CA,  
316 USA) and separated for 40 min at 40 mA. Protein bands were visualized by staining with InstantBlue®  
317 protein stain and imaging with the Bio-Rad ChemiDoc™ imager.

## 318 Expression and purification of MxSafC

319 Plasmid c157 was transformed into chemically competent *E. coli* BL21 DE3 ( $F^- ompT gal dcm lon hsdS_B(r_B^-$   
320  $m_B^-) \lambda$ (DE3 [*lacI lacUV5-T7p07 ind1 sam7 nin5*] [*malB'*]<sub>K12</sub>( $\lambda^S$ )) and maintained on selective LB agar  
321 containing 100  $\mu$ g/mL carbenicillin. A starter culture was inoculated from a single colony (5 mL, LB with  
322 carbenicillin) and incubated overnight at 37°C, 250 rpm. The main culture was inoculated from the  
323 starter culture (1:100) and incubated at 37°C, 250 rpm until an optical density OD<sub>600</sub> of 0.7 was reached.  
324 Expression was induced with Isopropyl  $\beta$ -D-1-thiogalactopyranoside (IPTG, 1 mM final) and the  
325 temperature was lowered to 30°C (250 rpm, overnight). All following steps were performed at 4°C with  
326 chilled buffers. The cells were harvested by centrifugation (10 min, 3,000 rpm) and resuspended in  
327 20 mL lysis buffer (buffer A including one EDTA-free protease inhibitor tablet (Roche) and 10 mg/mL  
328 lysozyme; buffer A: 50 mM Tris/HCl pH 7.4, 500 mM NaCl, 10 mM imidazole). The cell suspension was  
329 incubated on ice for 20 min, lysed by sonication (20% duty cycle, 10 cycles of 15 s ON/15 s OFF) and  
330 cleared by centrifugation for 20 min at 40,000 x g. The supernatant was loaded onto the affinity matrix  
331 equilibrated with buffer A by gravity flow (Qiagen, Ni-NTA agarose slurry, 0.25 mL column volume). The  
332 column was washed with 20 column volumes of buffer A and eluted stepwise with one column volume  
333 of buffers B1 to B6 (buffers B1-B6: 50 mM Tris/HCl pH 7.4, 500 mM NaCl, 50 mM imidazole/ 100 mM  
334 imidazole/ 150 mM imidazole/ 200 mM imidazole/ 250 mM imidazole or 500 mM imidazole,  
335 respectively). The eluates of each step were collected in separate fractions and analyzed by SDS PAGE.  
336 MxSafC containing fractions with low protein background were pooled and dialyzed overnight at 4°C  
337 against storage buffer (20 mM Tris/HCl pH 7.4, 50 mM NaCl, 0.2 mM MgCl<sub>2</sub>, 2 mM DTT). The protein  
338 concentration was determined by absorbance at 280 nm (NanoDrop, ThermoFisher Scientific, USA)  
339 before the purified enzyme was aliquoted and stored at -70°C.

### 340 *In vitro* OMT reaction

341 The *in vitro* OMT reaction was adapted from the conditions used by Siegrist et al.<sup>32</sup>. To minimize  
342 pipetting errors, a master mix including all reaction components, but the enzyme was prepared (50 mM  
343 HEPES/NaOH pH 7, 20 mM MgCl<sub>2</sub>, 2 mM SAM, 2 mM substrate (from 40x stock in DMSO)). The total  
344 reaction volume was 42 μL, with 2 μL of purified enzyme/ TXTL reaction used in the initial experiment  
345 and later 5 μL of a diluted stock (2.5-fold dilution in OMT reaction buffer) to further minimize pipetting  
346 errors. After aliquoting the master mix into 96-well microtiter plates (200 μL round-bottom plates), the  
347 TXTL samples were added and mixed by carefully pipetting up and down. Purified MxSafC enzyme was  
348 included in one well as a positive control. The “no OMT” controls (see section “*In vitro*  
349 transcription/translation”) were treated like the other enzyme samples. The sealed plates were  
350 incubated at 30°C for 24 h before the reactions were quenched with HClO<sub>4</sub> (final 2% v/v from a 10% v/v  
351 stock) and centrifuged. The supernatants were analyzed by Time Resolved-Fluorescence Energy  
352 Resonance Transfer (TR-FRET) and (optionally) by High Performance Liquid Chromatography (HPLC).

### 353 TR-FRET assay for SAM detection

354 To detect the consumption of the SAM co-factor as a measure of OMT reactivity, we used the TR-FRET  
355 Bridge-It® S-Adenosyl Methionine (SAM) Fluorescence Assay Kit from Mediomics LLC (St. Louis, Missouri)  
356 according to the manufacturer’s instructions with slight modifications. In brief, we thawed the assay  
357 solution at 37°C for 30 min and transferred 18 μL into the wells of a white 384-well round-bottom  
358 polystyrene plate (Corning, NY, USA). We diluted the quenched OMT reactions 21-fold by mixing 2 μL of  
359 the reaction with 40 μL of water by pipetting up and down, and transferred the samples to the 384-well  
360 plate without bubbling. In addition to the “no OMT” controls (no SAM consumption expected), one or  
361 two wells were measured with only the TR-FRET assay solution (20 μL, “blank”). The plate was incubated  
362 in the dark for 30 min at room temperature before measuring the TR-FRET signal in a Tecan Infinite-200  
363 plate reader with the following settings: *mode*: fluorescence top reading, *excitation wavelength*:  
364 340 nm, *emission wavelength*: 667 nm, *excitation bandwidth*: 9 nm, *emission bandwidth*: 20 nm, *gain*:  
365 220 (manual), *number of flashes*: 100, *integration time*: 400 μs, *lag time*: 50 μs, *settle time*: 150 ms. The  
366 ratio of the acceptor channel counts to the donor channel counts was calculated for all measured wells  
367 (FRET), baseline corrected with the FRET ratio of the “blank” and normalized to the average of the FRET  
368 ratio of the “no OMT” controls to obtain the relative SAM detection (Eq. 1). In the initial experiment, the  
369 samples were handled with single-channel pipettes, whereas in the later experiments, multichannel  
370 pipettes were used throughout to minimize pipetting errors.

371 Eq 1: relative SAM detection= $(\text{FRET}-\text{FRET}_{\text{blank}})/\text{Average}(\text{FRET}_{\text{noOMT}}-\text{FRET}_{\text{blank}})$  with  
372  $\text{FRET}=\text{counts}_{667}/\text{counts}_{620}$

### 373 Fermentation

374 The OMT encoding plasmids were transformed into chemically competent<sup>33</sup> *E. coli* K12 MG1655(DE3)<sup>34</sup>  
375 already bearing the plasmids c84 and c86 encoding for CYP199A2 F185L NΔ7 and its redox partners  
376 putidaredoxin (Pux) and putidaredoxin reductase (PuR). All strains generated in this way are listed in  
377 Extended Data Table 3. The final strains were maintained on selective media with carbenicillin,  
378 spectinomycin and kanamycin at all times. Starter cultures were prepared from three individual colonies  
379 of the final strains in 5 mL Lysogeny broth (LB) supplemented with carbenicillin (100 µg/mL),  
380 spectinomycin (50 µg/mL) and kanamycin (50 µg/mL) in round-bottom polystyrene tubes, incubated  
381 over night at 37°C with agitation and used to inoculate the main cultures (7 mL LB with antibiotics;  
382 round-bottom polystyrene tubes). After 4 h of growth at 37°C, 250 rpm, OD<sub>600</sub> was measured and the  
383 appropriate volume of each culture pelleted and resuspended in modified, selective M9 medium  
384 including substrates and 4% glucose to obtain 15 mL cultures at OD<sub>600</sub> of 0.7 in sterile glass tubes. These  
385 cultures were incubated at 26°C, 160 rpm for 96 h. Samples of 200 µL were taken after 96 h and  
386 quenched with 50 µL of HClO<sub>4</sub> (10 % (v/v) stock), spun for 10 min at 20,000 x g and the supernatants  
387 were analyzed by HPLC. Media optimization was performed in small scale (5 mL in round-bottom  
388 polystyrene tubes) throughout the entire experiment.

389 M9 medium composition (1x) prepared from sterile stocks: M9 salts (Millipore-Sigma, used as 5x stock),  
390 Trace Mineral Supplement (ATCC® MD-TMS™, used as 200x stock), vitamin mix (from 100x stock; final:  
391 riboflavin 0.84 mg/L, folic acid 0.084 mg/L, nicotinic acid 12.2 mg/L, pyridoxine 2.8 mg/L, and  
392 pantothenic acid 10.8 mg/L), biotin (from 1000x stock; final: 0.24 mg/L), thiamine (from 1470x stock;  
393 final: 340 mg/L), δ-Aminolevulinic acid (from 1000x stock in MeOH, final: 7.5 µg/mL), IPTG (from 1000x  
394 stock, final: 1 mM), carbenicillin (from 1000x stock, final: 100 µg/mL), spectinomycin (from 1000x stock,  
395 final: 50 µg/mL), kanamycin (from 1000x stock, final: 50 µg/mL, 4% (w/v) glucose (from 50% w/v stock).  
396 Additives for media optimization experiments: caffeic acid (from fresh 100x stock in MeOH, final 2 mM)  
397 and either a) no further additives, b) MgCl<sub>2</sub> (from 500x sterile stock in water, final 2 mM) or c) MgCl<sub>2</sub>  
398 (from 500x sterile stock in water, final 2 mM) and L-methionine (from fresh 100x stock in 1M HCl, final  
399 10 mM). Additives for all other experiments: MgCl<sub>2</sub> (from 500x sterile stock in water, final 2 mM) and L-  
400 methionine and L-tyrosine (from fresh joined 100x stock in 1M HCl, final 10 mM and 3 mM,  
401 respectively).

## 402 HLPC analysis

403 The supernatants of the quenched *in vitro* OMT reactions and fermentation samples were analyzed by  
404 reversed-phase HPLC (instrument: Agilent 1100; autosampler: HiP sampler G1367A, T=4°C, 10 µL  
405 injection; column: Agilent Zorbax Eclipse XDB-C18 80Å, 4.6 x 150 mm, 5µm, T=30°C; detector: Agilent  
406 diode array detector G1315B, λ=275 nm (catechol and methylated products) and λ=310nm ((iso-)ferulic  
407 acid and pathway intermediates); gradient: 10% to 35% Acetonitrile with 0.1% Trifluoroacetic acid over  
408 17 min). The peaks for products and intermediates were identified by comparing the retention times to  
409 authentic standards. The integrated peak areas were converted to concentrations in mM based on  
410 calibration curves generated with authentic standards.

## 411 Sequence analysis of putative OMTs

412 We aligned the sequences with mafft v7.310<sup>35</sup>b (--genafpair), inferred the maximum likelihood  
413 phylogenies with FastTree v2.1.10<sup>36</sup> and visualized the tree and the corresponding activity heat map in  
414 Figure 4 with the R packages ggplot2<sup>37</sup> and ggtree<sup>38</sup>.

## 415 Acknowledgements

416 KH is grateful for the support by the Human Frontier Science Program (Grant Number LT000969/2016-  
417 L). This work was supported by the MIT Portugal Program (Grant Number 6937822).

## 418 Author Contributions

419 KH conceived the study, selected the putative OMTs, performed all experiments and wrote the  
420 manuscript with support and guidance by K.L.J.P. KH and TH analyzed the data and created figures. TH  
421 provided bioinformatics support. All authors read and approved the final version of this manuscript.

## 422 Competing Interests statement

423 The authors declare that they have no competing interests.

## 424 References

- 425 1. Liscombe, D. K., Louie, G. V. & Noel, J. P. Architectures, mechanisms and molecular evolution of  
426 natural product methyltransferases. *Natural Product Reports* **29**, 1238 (2012).
- 427 2. Vanholme, R., Demedts, B., Morreel, K., Ralph, J. & Boerjan, W. Lignin biosynthesis and structure.  
428 *Plant physiology* **153**, 895–905 (2010).
- 429 3. Kadoma, Y. & Fujisawa, S. A comparative study of the radical-scavenging activity of the  
430 phenolcarboxylic acids caffeic acid, p-coumaric acid, chlorogenic acid and ferulic acid, with or  
431 without 2-mercaptoethanol, a thiol, using the induction period method. *Molecules* **13**, 2488–  
432 2499 (2008).
- 433 4. Taram, F., Winter, A. N. & Linseman, D. A. Neuroprotection comparison of chlorogenic acid and  
434 its metabolites against mechanistically distinct cell death-inducing agents in cultured cerebellar

- 435 granule neurons. *Brain Research* **1648**, 69–80 (2016).
- 436 5. Koirala, N., Thuan, N. H., Ghimire, G. P., Thang, D. Van & Sohng, J. K. Methylation of flavonoids:  
437 Chemical structures, bioactivities, progress and perspectives for biotechnological production.  
438 *Enzyme and Microbial Technology* **86**, 103–116 (2016).
- 439 6. Wen, L. *et al.* Structure, bioactivity, and synthesis of methylated flavonoids. *Annals of the New*  
440 *York Academy of Sciences* **1398**, 120–129 (2017).
- 441 7. Li, Y. *et al.* Dissociation of Antimicrobial and Hemolytic Activities of Gramicidin S through N-  
442 Methylation Modification. *ChemMedChem* **8**, 1865–1872 (2013).
- 443 8. Das, D. *et al.* Synthesis, SAR and biological studies of sugar amino acid-based almiramide  
444 analogues: N-methylation leads the way. *Org. Biomol. Chem* **15**, 3337 (2017).
- 445 9. Zahid Khan, M. & Nawaz, W. The emerging roles of human trace amines and human trace amine-  
446 associated receptors (hTAARs) in central nervous system. *Biomedicine and Pharmacotherapy* **83**,  
447 439–449 (2016).
- 448 10. Finkle, B. J. & Nelson, R. F. Enzyme reactions with phenolic compounds: a meta-O-  
449 methyltransferase in plants. *Biochimica et Biophysica Acta* **78**, 747–749 (1963).
- 450 11. Higuchi, T., Shimada, M., Nakatsubo, F. & Tanahashi, M. *Differences in Biosyntheses of Guaiacyl*  
451 *and Syringyl Lignins in Woods*. *Wood Science and Technology* **11**, (Springer-Verlag, 1977).
- 452 12. Hicks, M. a. & Prather, K. L. J. *Bioprospecting in the Genomic Age. Advances in Applied*  
453 *Microbiology* **87**, (Elsevier Inc., 2014).
- 454 13. Chao, R., Mishra, S., Si, T. & Zhao, H. Engineering biological systems using automated  
455 biofoundries. doi:10.1016/j.ymben.2017.06.003
- 456 14. Casini, A. *et al.* A Pressure Test to Make 10 Molecules in 90 Days: External Evaluation of Methods  
457 to Engineer Biology. *J Am Chem Soc* **140**, 4302–4316 (2018).
- 458 15. Jacques, P. *et al.* High-throughput strategies for the discovery and engineering of enzymes for  
459 biocatalysis. *Bioprocess and Biosystems Engineering* **40**, 161–180 (2017).
- 460 16. Longwell, C. K., Labanieh, L. & Cochran, J. R. High-throughput screening technologies for enzyme  
461 engineering. doi:10.1016/j.copbio.2017.05.012
- 462 17. Garamella, J., Marshall, R., Rustad, M. & Noireaux, V. The All E. coli TX-TL Toolbox 2.0: A Platform  
463 for Cell-Free Synthetic Biology. *ACS Synthetic Biology* **5**, 344–355 (2016).
- 464 18. Shin, J. & Noireaux, V. Efficient cell-free expression with the endogenous E. Coli RNA polymerase  
465 and sigma factor 70. *Journal of Biological Engineering* **4**, 8 (2010).
- 466 19. Heyduk, T. & Heyduk, E. Molecular beacons for detecting DNA binding proteins. *Nature*  
467 *Biotechnology* **20**, 171–176 (2002).
- 468 20. Tian, L., Wang, R. E., Fei, Y. & Chang, Y.-H. A homogeneous fluorescent assay for cAMP-  
469 phosphodiesterase enzyme activity. *Journal of biomolecular screening* **17**, 409–14 (2012).
- 470 21. Potter, S. C. *et al.* HMMER web server: 2018 update. *Nucleic Acids Research* **46**, W200–W204  
471 (2018).

- 472 22. Sievers, F. *et al.* Fast, scalable generation of high-quality protein multiple sequence alignments  
473 using Clustal Omega. *Molecular systems biology* **7**, 539 (2011).
- 474 23. Joshi, C. P. & Chiang, V. L. Conserved sequence motifs in plant S-adenosyl-L-methionine-  
475 dependent methyltransferases. *Plant Molecular Biology* **37**, 663–674 (1998).
- 476 24. Liu, X. *et al.* Systematic analysis of O-methyltransferase gene family and identification of  
477 potential members involved in the formation of O-methylated flavonoids in Citrus. *Gene* **575**,  
478 458–472 (2016).
- 479 25. Nelson, J. T., Lee, J., Sims, J. W. & Schmidt, E. W. Characterization of SafC, a catechol 4-O-  
480 methyltransferase involved in saframycin biosynthesis. *Applied and Environmental Microbiology*  
481 **73**, 3575–3580 (2007).
- 482 26. Kopycki, J. G. *et al.* Functional and structural characterization of a cation-dependent O-  
483 methyltransferase from the cyanobacterium [*i*]Synechocystis[*i*] sp. strain PCC 6803. *Journal of*  
484 *Biological Chemistry* **283**, 20888–20896 (2008).
- 485 27. Hou, X. *et al.* Crystal structure of SAM-dependent O-methyltransferase from pathogenic  
486 bacterium *Leptospira interrogans*. *Journal of Structural Biology* **159**, 523–528 (2007).
- 487 28. Youngdae, Y. *et al.* Characterization of an O-methyltransferase from [*i*]Streptomyces  
488 avermitilis[*i*] MA-4680. *Journal of Microbiology and Biotechnology* **20**, 1359–1366 (2010).
- 489 29. Gerlt, J. A. *et al.* Enzyme Function Initiative-Enzyme Similarity Tool (EFI-EST): A web tool for  
490 generating protein sequence similarity networks. *Biochimica et biophysica acta* **1854**, 1019–37  
491 (2015).
- 492 30. Shannon, P. *et al.* Cytoscape: A Software Environment for Integrated Models. *Genome Research*  
493 **13**, 2498–504 (2003).
- 494 31. Haslinger, K. & Prather, K. L. J. Heterologous caffeic acid biosynthesis in *Escherichia coli* is  
495 affected by choice of tyrosine ammonia lyase and redox partners for bacterial Cytochrome P450.  
496 *Microbial Cell Factories* **19**, (2020).
- 497 32. Siegrist, J. *et al.* Functional and structural characterisation of a bacterial O -methyltransferase and  
498 factors determining regioselectivity. *FEBS Letters* **591**, 312–321 (2017).
- 499 33. Inoue, H., Nojima, H. & Okayama, H. High efficiency transformation of *Escherichia coli* with  
500 plasmids. *Gene* **96**, 23–28 (1990).
- 501 34. Nielsen, D. R., Yoon, S.-H., Yuan, C. J. & Prather, K. L. J. Metabolic engineering of acetoin and  
502 meso-2, 3-butanediol biosynthesis in *E. coli*. *Biotechnology journal* **5**, 274–84 (2010).
- 503 35. Nakamura, T., Yamada, K. D., Tomii, K. & Katoh, K. Parallelization of MAFFT for large-scale  
504 multiple sequence alignments. *Bioinformatics* **34**, 2490–2492 (2018).
- 505 36. Price, M. N., Dehal, P. S. & Arkin, A. P. FastTree 2 - Approximately maximum-likelihood trees for  
506 large alignments. *PLoS ONE* **5**, e9490 (2010).
- 507 37. Wickham, H. ggplot2. *Wiley Interdisciplinary Reviews: Computational Statistics* **3**, 180–185  
508 (2011).
- 509 38. Yu, G., Tsan, T., Lam, Y., Zhu, H. & Guan, Y. Two Methods for Mapping and Visualizing Associated



- 510 Data on Phylogeny Using Ggtree. *Mol. Biol. Evol.* **35**, 3041–3043 (2018).
- 511 39. Zubieta, C., Kota, P., Ferrer, J., Dixon, R. a & Noel, J. P. Structural Basis for the Modulation of  
512 Lignin Monomer Methylation by Caffeic Acid / 5-Hydroxyferulic Acid 3 / 5- O -Methyltransferase.  
513 *The Plant Cell* **14**, 1265–1277 (2002).
- 514 40. Brandt, W., Manke, K. & Vogt, T. A catalytic triad - Lys-Asn-Asp - Is essential for the catalysis of  
515 the methyl transfer in plant cation-dependent O-methyltransferases. *Phytochemistry* **113**, 130–  
516 139 (2015).
- 517 41. Rodrigues, J. L., Araújo, R. G., Prather, K. L. J., Kluskens, L. D. & Rodrigues, L. R. Heterologous  
518 production of caffeic acid from tyrosine in *Escherichia coli*. *Enzyme and Microbial Technology* **71**,  
519 36–44 (2015).
- 520 42. Kunjapur, A. M., Hyun, J. C. & Prather, K. L. J. Deregulation of S-adenosylmethionine biosynthesis  
521 and regeneration improves methylation in the *E. coli* de novo vanillin biosynthesis pathway.  
522 *Microbial Cell Factories* **15**, 61 (2016).
- 523 43. Yin, G. *et al.* Aglycosylated antibodies and antibody fragments produced in a scalable in vitro  
524 transcription-translation system. *mAbs* **4**, 217–225 (2012).
- 525 44. Woodrow, K. A. & Swartz, J. R. A sequential expression system for high-throughput functional  
526 genomic analysis. *PROTEOMICS* **7**, 3870–3879 (2007).
- 527 45. McManus, J. B., Emanuel, P. A., Murray, R. M. & Lux, M. W. A method for cost-effective and rapid  
528 characterization of engineered T7-based transcription factors by cell-free protein synthesis  
529 reveals insights into the regulation of T7 RNA polymerase-driven expression. *Archives of*  
530 *Biochemistry and Biophysics* **674**, 108045 (2019).
- 531 46. Cortès, S., Hibti, F. E., Chiraz, F. & Ezzine, S. High-throughput *E. coli* cell-free expression: From  
532 PCR product design to functional validation of GPCR. in *Methods in Molecular Biology* **2025**, 261–  
533 279 (Humana Press Inc., 2019).
- 534 47. Halleran, A. D. & Murray, R. M. Cell-Free and In Vivo Characterization of Lux, Las, and Rpa  
535 Quorum Activation Systems in *E. coli*. *ACS Synthetic Biology* **7**, 752–755 (2018).
- 536 48. Dudley, Q. M., Nash, C. J. & Jewett, M. C. Cell-free biosynthesis of limonene using enzyme-  
537 enriched *Escherichia coli* lysates. *Synthetic Biology* **4**, (2019).
- 538 49. Dopp, J. L., Rothstein, S. M., Mansell, T. J. & Reuel, N. F. Rapid prototyping of proteins: Mail order  
539 gene fragments to assayable proteins within 24 hours. *Biotechnology and Bioengineering* **116**,  
540 667–676 (2019).
- 541 50. Parvathi, K., Chen, F., Guo, D., Blount, J. W. & Dixon, R. A. Substrate preferences of O-  
542 methyltransferases in alfalfa suggest new pathways for 3-O-methylation of monolignols. *Plant*  
543 *Journal* **25**, 193–202 (2001).
- 544 51. Osakabe, K. *et al.* Coniferyl aldehyde 5-hydroxylation and methylation direct syringyl lignin  
545 biosynthesis in angiosperms. *Proceedings of the National Academy of Sciences* **96**, 8955–8960  
546 (1999).
- 547 52. Li, L., Popko, J. L., Umezawa, T. & Chiang, V. L. 5-Hydroxyconiferyl aldehyde modulates enzymatic  
548 methylation for syringyl monolignol formation, a new view of monolignol biosynthesis in

549            angiosperms. *Journal of Biological Chemistry* **275**, 6537–6545 (2000).

## 550 Tables

551 *Table 1: List of putative OMT selected for experimental characterization.*

| protein name in this study                                     | Uniprot name     | donor organism                                     | Domain    | Phylum (class)                        | HMMsearch |       | cat. triad |
|----------------------------------------------------------------|------------------|----------------------------------------------------|-----------|---------------------------------------|-----------|-------|------------|
|                                                                |                  |                                                    |           |                                       | E-value   | Score |            |
| <b>HMMsearch 1 (plant caffeic acid OMTs as seed sequences)</b> |                  |                                                    |           |                                       |           |       |            |
| AlkOMT                                                         | A0A251WJU7_9CYAN | <i>Alkalinema sp.</i> CACIAM 70d                   | Bacteria  | Cyanobacteria (Melainabacteria group) | 4.10E-44  | 162   | H-E-E      |
| BraLOMT                                                        | A0A0R3MQ32_9BRAD | <i>Bradyrhizobium lablabi</i>                      | Bacteria  | Proteobacteria (Alpha)                | 2.10E-33  | 126.7 | H-E-E      |
| BucROMT                                                        | A0A091HDB2_BUCRH | <i>Buceros rhinoceros silvestris</i>               | Eukaryota | Metazoa                               | 5.70E-27  | 105.6 | H-E-E      |
| CanNOMT                                                        | A0A0N9Y1E2_9ARCH | <i>Candidatus Nitrocosmic oleophilus</i>           | Archaea   | Thaumarchaeota                        | 4.90E-32  | 122.2 | H-E-E      |
| CreAOMT                                                        | A0A1Q7MH91_9CREN | <i>Crenarchaeota archaeon</i> 13_1_40CM_3_52_17    | Archaea   | Crenarchaeota                         | 7.50E-31  | 118.3 | H-G-E      |
| DicDOMT                                                        | OMT12_DICDI      | <i>Dictyostelium discoideum</i>                    | Eukaryota | Mycetozoa                             | 7.70E-31  | 118.3 | H-D-E      |
| GloKOMT                                                        | U5QFM0_9CYAN     | <i>Gloeobacter kilauensis</i> JS1                  | Bacteria  | Cyanobacteria (Melainabacteria group) | 4.20E-45  | 165.2 | S-E-E      |
| GloOMT                                                         | K9XAK2_9CHRO     | <i>Gloeocapsa sp.</i> PCC 7428                     | Bacteria  | Cyanobacteria (Melainabacteria group) | 7.80E-37  | 138   | H-Q-W      |
| HalOMT                                                         | U1MFJ5_9EURY     | halophilic archaeon J07HX5                         | Archaea   | Halobacteria                          | 5.60E-30  | 115.4 | H-E-E      |
| HymGOMT                                                        | A0A212T1X1_9BACT | <i>Hymenobacter gelipurpurascens</i>               | Bacteria  | Bacteroidetes (Chlorobi group)        | 7.70E-42  | 154.5 | H-E-E      |
| LegHOMT                                                        | A0A0A8UVF9_LEGHA | <i>Legionella hackeliae</i>                        | Bacteria  | Gammaproteobacteria                   | 9.50E-29  | 111.4 | H-E-Q      |
| MesMOMT                                                        | A0A1G9C2B4_9RHIZ | <i>Mesorhizobium muleiense</i>                     | Bacteria  | Alphaproteobacteria                   | 9.40E-34  | 127.9 | H-E-E      |
| SapPOMT                                                        | A0A067BNB9_SAPPC | <i>Saprolegnia parasitica</i> (strain CBS 223.65)  | Eukaryota | Oomycetes                             | 3.70E-28  | 109.5 | H-D-E      |
| TielOMT                                                        | A0A151ZKG1_9MYCE | <i>Tieghemostelium lacteum</i>                     | Eukaryota | Mycetozoa                             | 5.50E-28  | 108.9 | H-D-E      |
| <b>HMMsearch 2 (bacterial OMTs as seed sequences)</b>          |                  |                                                    |           |                                       |           |       | K-N-D      |
| AciOMT                                                         | A0A178GH82_9GAMM | <i>Acinetobacter sp.</i> SFD                       | Bacteria  | Gammaproteobacteria                   | 5.60E-27  | 105.4 | R-N-A      |
| ChiCOMT                                                        | A0A1M6USV2_9FLAO | <i>Chishuiella changwenlii</i>                     | Bacteria  | Bacteroidetes (Chlorobi group)        | 2.20E-54  | 195   | K-N-D      |
| DesAOMT                                                        | Q1JXV1_DESA6     | <i>Desulfuromonas acetoxidans</i> (strain DSM 684) | Bacteria  | Proteobacteria (delta/epsilon)        | 3.70E-30  | 115.8 | R-N-K      |
| KibpOMT                                                        | A0A0N9HPV5_9PSEU | <i>Kibdelosporangium phytohabitans</i>             | Bacteria  | Actinobacteria                        | 5.10E-41  | 151.3 | K-N-D      |
| OmnOMT                                                         | A0A1G1JPP6_9BACT | <i>Omnitrophica bacterium</i> GWA2_52_8            | Bacteria  | (PVC group) Candidatus Omnitrophica   | 2.40E-54  | 194.9 | K-N-D      |
| PhoAOMT                                                        | A0A1U7IJN5_9CYAN | <i>Phormidium ambiguum</i> IAM M-71                | Bacteria  | Cyanobacteria (Melainabacteria group) | 2.00E-93  | 322.7 | K-N-D      |
| RetFOMT                                                        | X6M5Z7_RETFI     | <i>Reticulomyxa filosa</i>                         | Eukaryota | Foraminifera                          | 4.90E-54  | 193.9 | K-N-D      |
| SalOMT                                                         | R4W9N9_9EURY     | <i>Salinarchaeum sp.</i> Harcht-Bsk1               | Archaea   | Halobacteria                          | 2.30E-25  | 100.1 | K-N-D      |
| SarHOMT                                                        | G3WFI7_SARHA     | <i>Sarcophilus harrisii</i>                        | Eukaryota | Metazoa                               | 2.80E-54  | 194.7 | K-N-D      |
| SelSOMT                                                        | A0A1T4QLE1_9FIRM | <i>Selenihalanaerobacter shriftii</i>              | Bacteria  | Firmicutes                            | 2.90E-42  | 155.4 | K-N-D      |

|                |                  |                                                         |           |                                   |          |       |       |
|----------------|------------------|---------------------------------------------------------|-----------|-----------------------------------|----------|-------|-------|
| <b>StiAOMT</b> | E3FEM3_STIAD     | <i>Stigmatella aurantiaca</i>                           | Bacteria  | Proteobacteria<br>(delta/epsilon) | 6.20E-20 | 82.4  | K-N-S |
| <b>StyLOMT</b> | A0A078AUZO_STYLE | <i>Stylonychia lemnae</i>                               | Eukaryota | Ciliophora                        | 2.40E-54 | 194.9 | K-N-D |
| <b>TheMOMT</b> | E6SHY4_THEM7     | <i>Thermaerobacter marianensis</i> (strain ATCC 700841) | Bacteria  | Firmicutes                        | 6.90E-64 | 226.1 | K-N-D |
| <b>VerLOMT</b> | A0A0G4MCD6_9PEZI | <i>Verticillium longisporum</i>                         | Eukaryota | Fungi                             | 7.00E-21 | 85.5  | K-N-D |

552 **Figures**

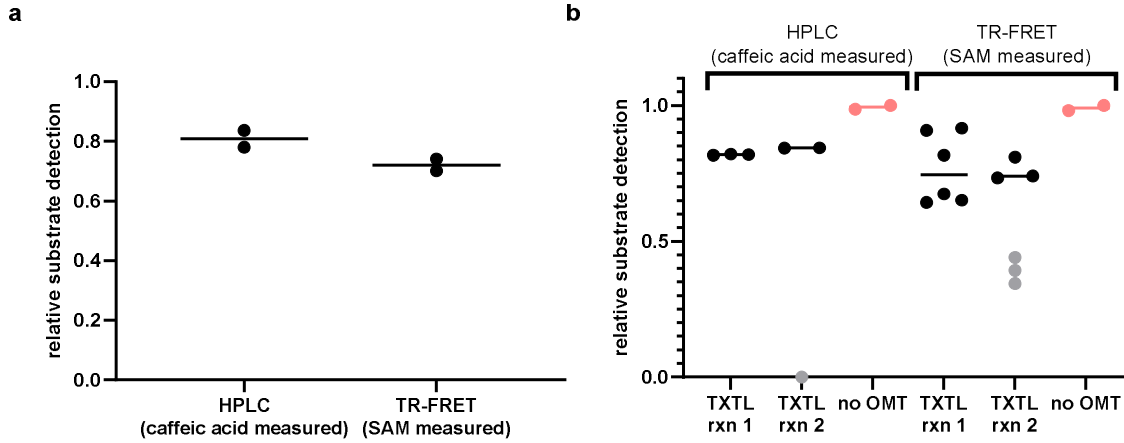

553

554 *Figure 1: Substrate detection at the end of the OMT reaction with MxSafC as a catalyst relative to the negative controls*  
555 *measured by HPLC (caffeic acid concentration measured) and TR-FRET (SAM concentration measured). a) OMT reaction*  
556 *performed with recombinantly expressed and purified MxSafC (data points are biological replicates (n=2, median)). b) OMT*  
557 *reaction performed with MxSafC expressed from linear DNA in the myTXTL in vitro transcription/translation kit (two biological*  
558 *replicates are shown in separate columns; data points within each column are technical replicates of the OMT reaction and the*  
559 *TR-FRET assay; “no OMT” data points are biological replicates; outliers (grey data points) are likely caused by a pipetting error in*  
560 *the OMT assay and were excluded from determining the median).*

561

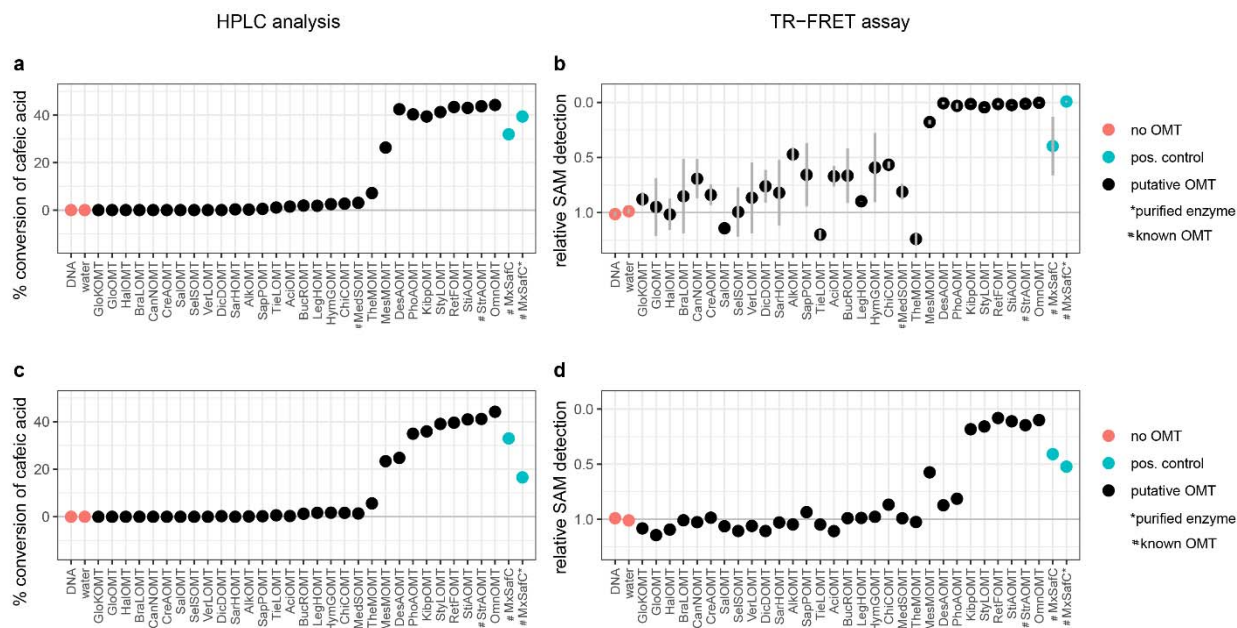

562  
 563 *Figure 2: Screening of 30 enzymes of interest against caffeic acid as substrate and SAM as co-substrate in two independent*  
 564 *experiments. OMT reaction stopped after 24h. a) and c) Samples analyzed by HPLC, expressed as percent caffeic acid converted.*  
 565 *b) and d) Samples analyzed by TR-FRET expressed as SAM levels detected relative to the “no OMT” controls; b) technical*  
 566 *replicates of the TR-FRET assay shown as mean +/- SD, n=2; d) single measurement. Data points sorted by increasing substrate*  
 567 *turnover based on panel c; Red data points – negative controls, blue data points – positive controls.*

568

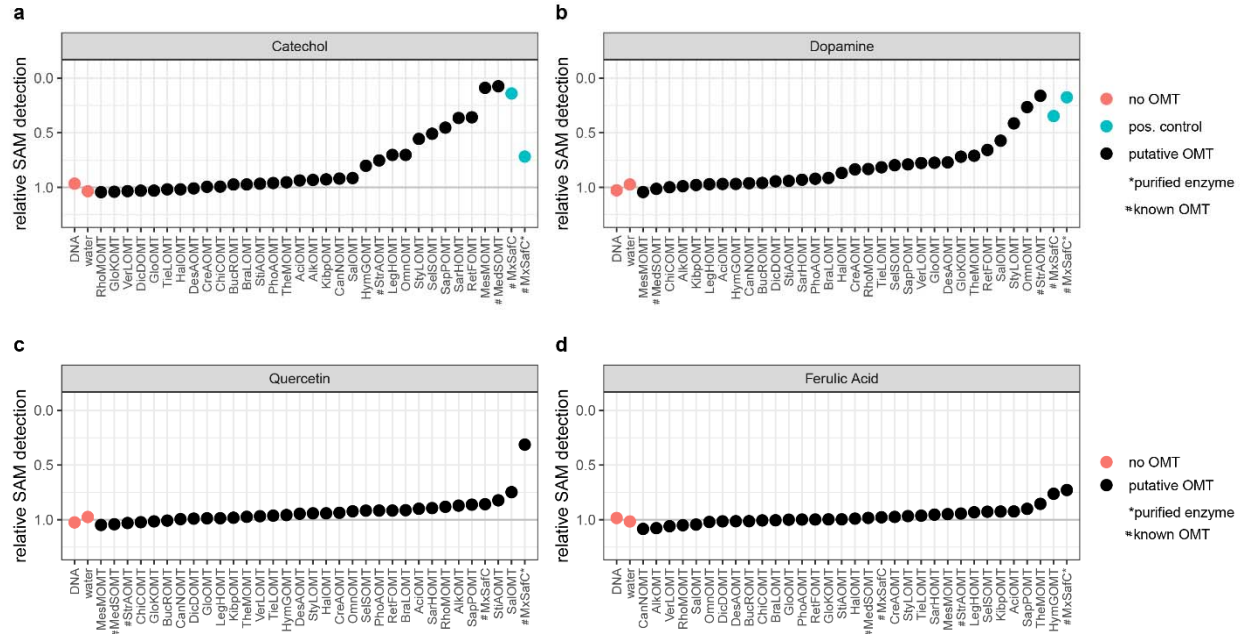

569

570 *Figure 3: Screening for OMT activity of all enzymes of interest in vitro with four different substrates. a) catechol, b) dopamine, c)*  
 571 *quercetin and d) ferulic acid. Data points ordered by increasing substrate conversion for each panel from left to right; Red data*  
 572 *points – negative controls, blue data points – positive controls (if available).*

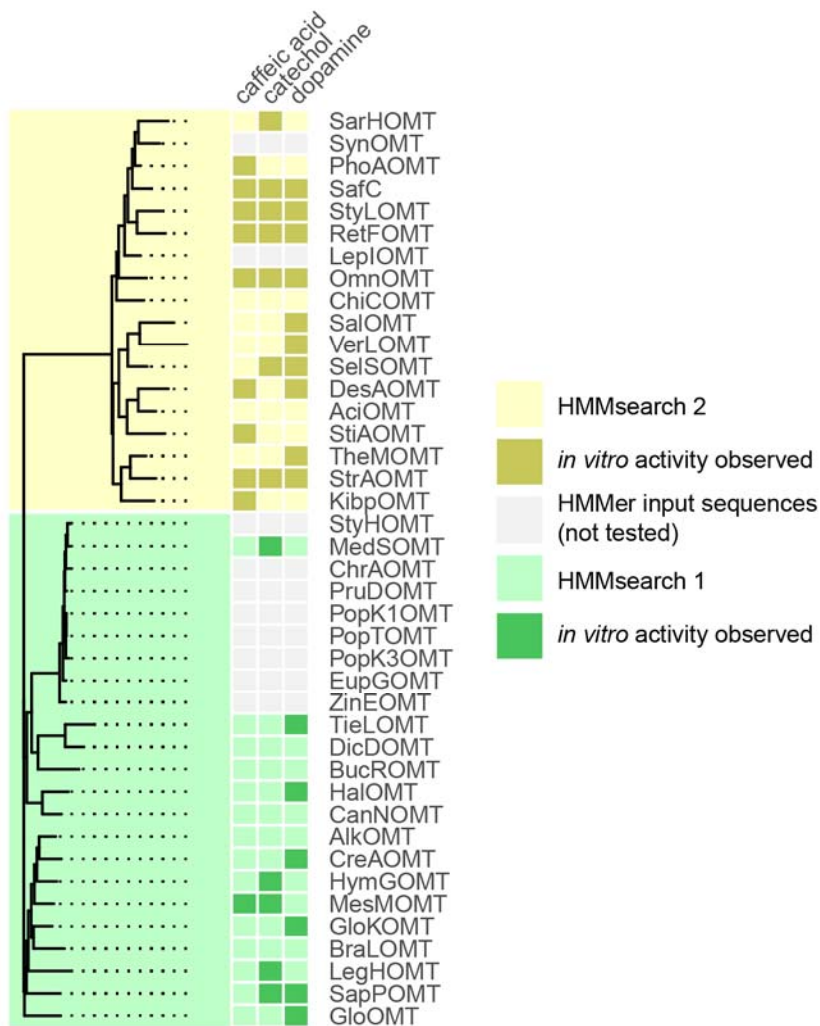

573  
 574 Figure 4: Phylogenetic tree based on a multiple sequence alignment of the enzymes screened in this study and the HMMsearch  
 575 input sequences (left; green: HMMsearch1; yellow: HMMsearch 2) side-by-side with the *in vitro* activity data on caffeic acid,  
 576 catechol and dopamine (right, dark color=*in vitro* activity observed).



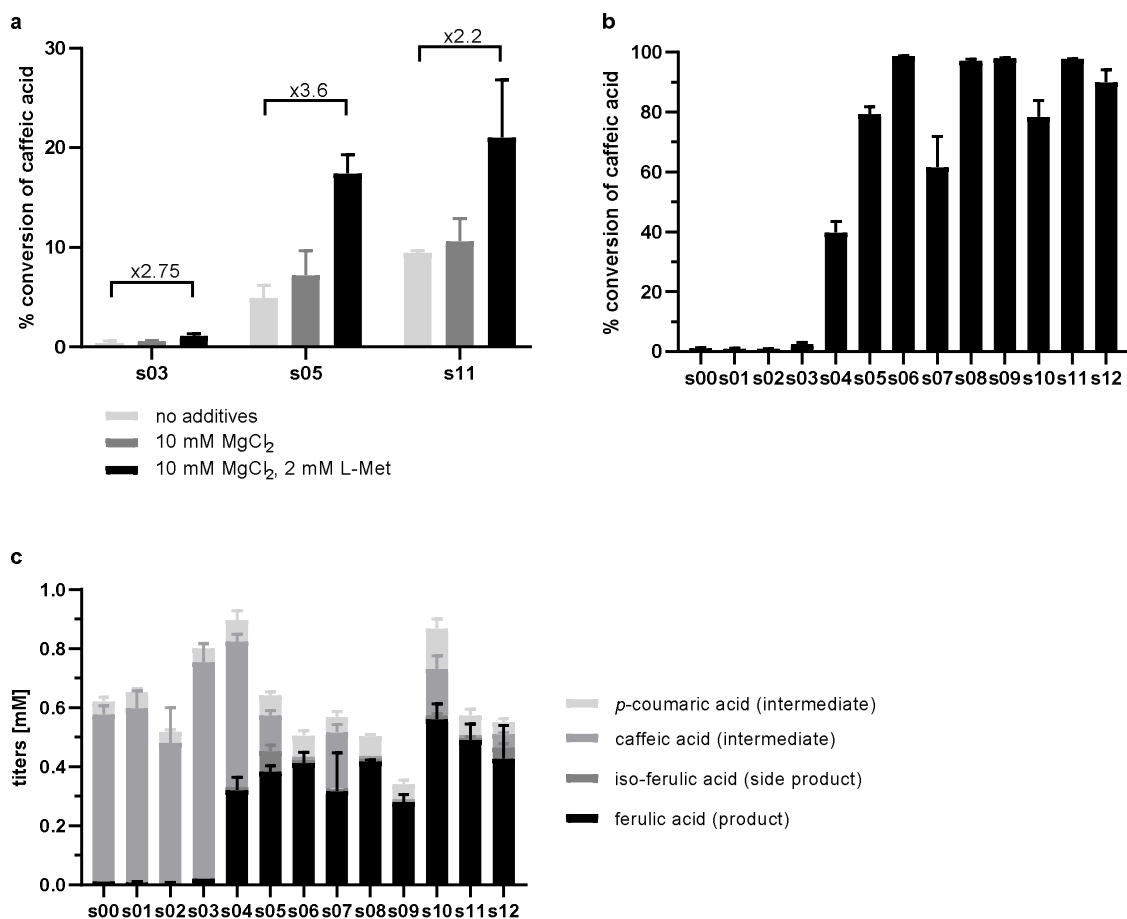

577  
578

579 *Figure 5: Fermentation of E. coli K12 MG1655(DE3) expressing a recombinant pathway to produce (iso-)ferulic acid. a) Media*  
 580 *optimization performed with feeding of the pathway intermediate caffeic acid (2 mM); data displayed as percent conversion of*  
 581 *fed caffeic acid. b) and c) Experiment performed with optimized media with glucose as a carbon source and L-Tyrosine (3mM) as*  
 582 *a pathway precursor; data displayed as percent conversion of produced caffeic acid (panel b) or as stacked histogram of titers of*  
 583 *product, side product and pathway intermediates (panel c). Mean +/- SD, n=3.*

584 **Extended Data Tables**

585 *Extended Data Table 1: Table of input sequences for HMMsearch1 and 2.*

| GenBank                                                         | Uniprot | Uniprot name | Organism                                                                                         | Length in AA |
|-----------------------------------------------------------------|---------|--------------|--------------------------------------------------------------------------------------------------|--------------|
| <b>HMM search 1 (plant caffeic acid OMTs as seed sequences)</b> |         |              |                                                                                                  |              |
| U16793                                                          | Q42653  | OMT2_CHRAE   | <i>Chrysosplenium americanum</i> (Golden saxifrage)                                              | 343          |
| U13171                                                          | Q00763  | COMT1_POPTM  | <i>Populus tremuloides</i> (Quaking aspen)                                                       | 365          |
| M63853                                                          | P28002  | COMT1_MEDSA  | <i>Medicago sativa</i> (Alfalfa)                                                                 | 365          |
| X74814                                                          | P46484  | COMT1_EUCGU  | <i>Eucalyptus gunnii</i> (Cider gum)                                                             | 366          |
| X83217                                                          | Q43609  | COMT1_PRUDU  | <i>Prunus dulcis</i> (Almond)                                                                    | 365          |
| D49710                                                          | Q43046  | COMT1_POPKI  | <i>Populus kitakamiensis</i> (Aspen) ( <i>Populus sieboldii</i> x <i>Populus grandidentata</i> ) | 365          |
| D49711                                                          | Q43047  | COMT3_POPKI  | <i>Populus grandidentata</i>                                                                     | 364          |
| L36109                                                          | /       | COMT_STYH    | <i>Stylosanthes humilis</i> (townsville stylo)                                                   |              |
| U19911                                                          | Q43239  | COMT1_ZINVI  | <i>Zinnia elegans</i> (Garden zinnia)                                                            | 354          |
| <b>HMM search 2 (bacterial OMTs as seed sequences)</b>          |         |              |                                                                                                  |              |
| U24657                                                          | Q50859  | Q50859_MYXXA | <i>Myxococcus xanthus</i>                                                                        | 220          |
| BA000022                                                        | Q55813  | Q55813_SYNY3 | <i>Synechocystis sp.</i> (strain PCC 6803 / Kazusa)                                              | 220          |
| AE010300                                                        | Q8F8Y3  | Q8F8Y3_LEPIN | <i>Leptospira interrogans</i> serogroup Icterohaemorrhagiae serovar Lai (strain 56601)           | 231          |
| BA000030                                                        | Q82B68  | Q82B68_STRAW | <i>Streptomyces avermitilis</i> strain ATCC 31267                                                | 224          |

586 *Extended Data Table 2: List of plasmids used in this study with the enzymes expressed from the respective multiple cloning sites*  
 587 *(MCS), the 5' primer sequences and the restriction sites used for subcloning.*

| Plasmid ID | backbone  | enzyme expressed         |                               | 5' primer for subcloning             | restriction sites | source        |
|------------|-----------|--------------------------|-------------------------------|--------------------------------------|-------------------|---------------|
|            |           | MCSI                     | MCSII                         |                                      |                   |               |
| c84        | pCDFDuet  | 6His-Pux (putidaredoxin) | 6His-CYP199A2 F185L NΔ7       | /                                    | /                 | <sup>31</sup> |
| c62        | pETDuet   | 6His-Pux                 | PuR (putidaredoxin reductase) | /                                    | /                 | <sup>31</sup> |
| c71        | pRSFDuet  | 6His-FjTAL               | /                             | /                                    | NcoI, XhoI        | This study    |
| c157       | pET21(+)  | MxSafC                   | /                             | /                                    | NcoI, XhoI        | This study    |
| c160       | pET21b(+) | OmnOMT                   | /                             | /                                    | NcoI, XhoI        | This study    |
| c161       | pET21b(+) | DesAOMT                  | /                             | /                                    | NcoI, XhoI        | This study    |
| c162       | pET21b(+) | KibPOMT                  | /                             | /                                    | NcoI, XhoI        | This study    |
| c163       | pET21b(+) | MesMOMT                  | /                             | /                                    | NcoI, XhoI        | This study    |
| c164       | pET21b(+) | PhoAOMT                  | /                             | /                                    | NcoI, XhoI        | This study    |
| c165       | pET21b(+) | RetFOMT                  | /                             | /                                    | NcoI, XhoI        | This study    |
| c167       | pET21b(+) | StiAOMT                  | /                             | /                                    | NcoI, XhoI        | This study    |
| c168       | pET21b(+) | StrAOMT                  | /                             | /                                    | NcoI, XhoI        | This study    |
| c169       | pET21b(+) | StyLOMT                  | /                             | /                                    | NcoI, XhoI        | This study    |
| c193       | pET21b(+) | HalOMT                   | /                             | /                                    | NcoI, XhoI        | This study    |
| c194       | pET21b(+) | SalOMT                   | /                             | /                                    | NcoI, XhoI        | This study    |
| c180       | pRSFduet  | 6His-FjTAL               | MesMOMT                       | CCATGCATatggacgagcgggatgcg           | NdeI, XhoI        | This study    |
| c181       | pRSFduet  | 6His-FjTAL               | RetFOMT                       | CCATGCATatgggcaacagagcgacg           | NdeI, XhoI        | This study    |
| c182       | pRSFduet  | 6His-FjTAL               | StrAOMT                       | CCATGCATatgggctcagaatcgcaac          | NdeI, XhoI        | This study    |
| c183       | pRSFduet  | 6His-FjTAL               | MxSafC                        | CCATGCATatgggcatccatcatgtcg          | NdeI, XhoI        | This study    |
| c184       | pRSFduet  | 6His-FjTAL               | KipBOMT                       | CCATGCATatgggcacgctgaatgg            | NdeI, XhoI        | This study    |
| c186       | pRSFduet  | 6His-FjTAL               | OmnOMT                        | GCATGCATatgggcaaccaatccac            | NdeI, XhoI        | This study    |
| c187       | pRSFduet  | 6His-FjTAL               | DesAOMT                       | GCATGCATatgggcaacaagaactgcac         | NdeI, XhoI        | This study    |
| c188       | pRSFduet  | 6His-FjTAL               | PhoAOMT                       | GCATGCATatgggcaaaaaagaccttg          | NdeI, XhoI        | This study    |
| c190       | pRSFduet  | 6His-FjTAL               | StiAOMT                       | GCATGCATatgggcaatgaaaaggatgg         | NdeI, XhoI        | This study    |
| c191       | pRSFduet  | 6His-FjTAL               | StyLOMT                       | GCATGCATatggaagatcttaacaaagacaaatccg | NdeI, XhoI        | This study    |
| c197       | pRSFduet  | 6His-FjTAL               | HalOMT                        | GCATGCATatgggctcgacaagtctc           | NdeI, XhoI        | This study    |
| c198       | pRSFduet  | 6His-FjTAL               | SalOMT                        | GCATGCATatgggcacgctgtgtcc            | NdeI, XhoI        | This study    |

588 *Extended Data Table 3: List of bacterial strains used in this study to produce (iso-)ferulic acid from fed L-tyrosine or caffeic acid.*

| Strain ID | plamids            | enzymes expressed                                                   | source        |
|-----------|--------------------|---------------------------------------------------------------------|---------------|
| s00       | c84<br>c62<br>c71  | 6His-Pux, 6His-CYP199A2F185L NΔ7<br>6His-Pux, PuR<br>FJTAL          | <sup>31</sup> |
| s01       | c84<br>c62<br>c197 | 6His-Pux, 6His-CYP199A2F185L NΔ7<br>6His-Pux, PuR<br>FJTAL, HalOMT  | This study    |
| s02       | c84<br>c62<br>c198 | 6His-Pux, 6His-CYP199A2F185L NΔ7<br>6His-Pux, PuR<br>FJTAL, SalOMT  | This study    |
| s03       | c84<br>c62<br>c180 | 6His-Pux, 6His-CYP199A2F185L NΔ7<br>6His-Pux, PuR<br>FJTAL, MesMOMT | This study    |
| s04       | c84<br>c62<br>c187 | 6His-Pux, 6His-CYP199A2F185L NΔ7<br>6His-Pux, PuR<br>FJTAL, DesAOMT | This study    |
| s05       | c84<br>c62<br>c183 | 6His-Pux, 6His-CYP199A2F185L NΔ7<br>6His-Pux, PuR<br>FJTAL, MxSafC  | This study    |
| s06       | c84<br>c62<br>c188 | 6His-Pux, 6His-CYP199A2F185L NΔ7<br>6His-Pux, PuR<br>FJTAL, PhoAOMT | This study    |
| s07       | c84<br>c62<br>c184 | 6His-Pux, 6His-CYP199A2F185L NΔ7<br>6His-Pux, PuR<br>FJTAL, KipBOMT | This study    |
| s08       | c84<br>c62<br>c191 | 6His-Pux, 6His-CYP199A2F185L NΔ7<br>6His-Pux, PuR<br>FJTAL, StyLOMT | This study    |
| s09       | c84<br>c62<br>c181 | 6His-Pux, 6His-CYP199A2F185L NΔ7<br>6His-Pux, PuR<br>FJTAL, RetFOMT | This study    |
| s10       | c84<br>c62<br>c190 | 6His-Pux, 6His-CYP199A2F185L NΔ7<br>6His-Pux, PuR<br>FJTAL, StiAOMT | This study    |
| s11       | c84<br>c62<br>c182 | 6His-Pux, 6His-CYP199A2F185L NΔ7<br>6His-Pux, PuR<br>FJTAL, StrAOMT | This study    |
| s12       | c84<br>c62<br>c186 | 6His-Pux, 6His-CYP199A2F185L NΔ7<br>6His-Pux, PuR<br>FJTAL, OmnOMT  | This study    |

589 *Extended Data Table 4: Regioselectivity of OMT enzymes in vitro (pre-screen) and in vivo (fermentation) expressed as regio-*  
 590 *isomeric excess of the meta- over the para-product ( $RE = (c[meta] - c[para]) / (c[meta] + c[para]) * 100$ ).*

| OMT enzyme | pre-screen |      | fermentation |      |
|------------|------------|------|--------------|------|
|            | RE mean    | SD   | RE mean      | SD   |
| HalOMT     | n.d.       | n.d. | n.d.         | n.d. |
| SalOMT     | n.d.       | n.d. | n.d.         | n.d. |
| MesMOMT    | 86.44      | 0.00 | 100.00       | 0.00 |
| DesAOMT    | 32.09      | 7.01 | 93.87        | 0.76 |
| MxOMT      | -34.78     | 1.17 | 69.24        | 7.80 |
| PhoAOMT    | 39.04      | 6.29 | 95.25        | 0.39 |
| KibpOMT    | 46.40      | 5.92 | 93.13        | 2.88 |
| StyLOMT    | 49.06      | 3.81 | 95.31        | 0.06 |
| RetFOMT    | 88.04      | 9.95 | 100.00       | 0.00 |
| StiAOMT    | 48.83      | 9.18 | 95.41        | 1.64 |
| StrAOMT    | 62.38      | 9.45 | 97.27        | 2.41 |
| OmnOMT     | -2.96      | 3.41 | 84.65        | 2.58 |

591 Extended Data Figures

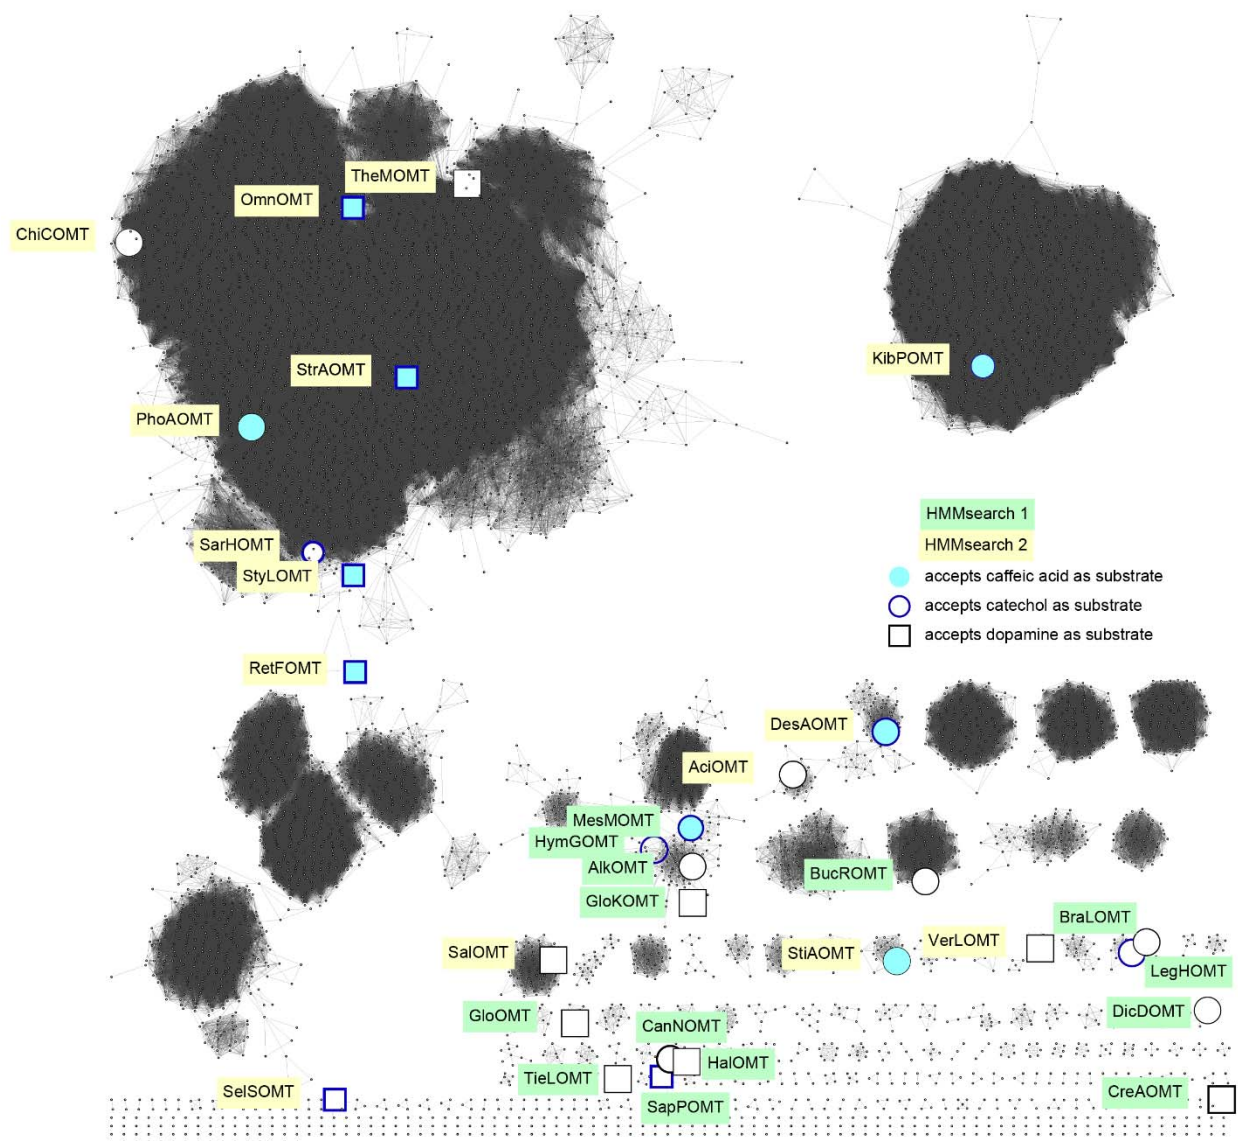

592  
 593 Extended Data Figure 1: Sequence similarity network calculated with the EFI-EST webtool and visualized with the yFiles organic  
 594 layout in Cytoscape with an edge cut-off at 50% sequence identity. Only nodes with an HMMsearch score of 70 or higher were  
 595 included in the generation of the network. Enlarged nodes with label: enzymes tested in this study; Yellow box: enzymes with  
 596 high sequence similarity to the bacterial input sequences, green box: enzymes with high sequence similarity to the plant input  
 597 sequences; open black circle: inactive on tested substrates, filled symbol: active on caffeic acid, blue outline: active on catechol,  
 598 rectangle: active on dopamine.

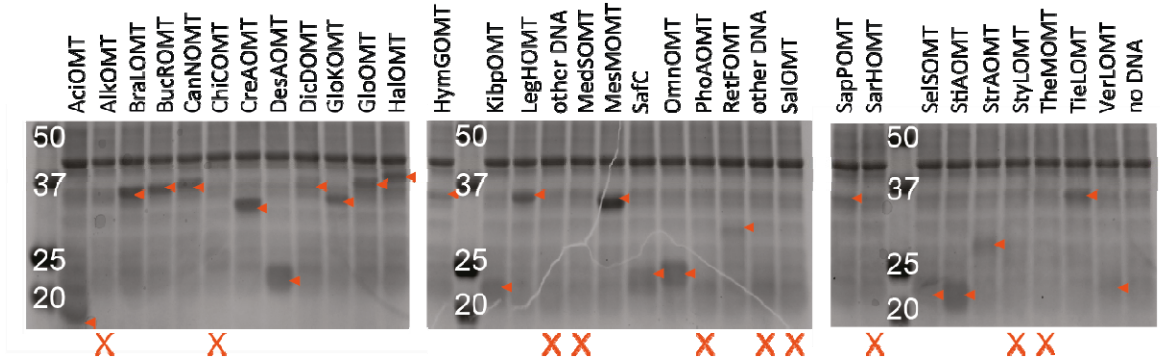

599

600 *Extended Data Figure 2: Coomassie stained SDS PAGE of putative OMTs expressed in TXTL reactions. Orange arrows indicate*  
 601 *protein bands suspected to represent the respective OMT. Lanes without obvious bands of the correct molecular weight are*  
 602 *marked with X below.*
